# Supplementary material for: V2Ox-based hole-selective contacts for c-Si interdigitated back-contacted solar cells
Source: Royal Society of Chemistry journal article supplement (doi:10.1039/c7ta01959a), 2017-01-01
Supplement: c7ta01959a1.pdf [file c7ta01959a1.pdf]

## V<sub>2</sub>O<sub>x</sub>-Based Hole-Selective Contacts for c-Si Interdigitated Back-Contacted Solar Cells

Received 00th January 20xx,  
Accepted 00th January 20xx

Gerard Masmitjà,<sup>\*a</sup> Luís G. Gerling,<sup>a</sup> Pablo Ortega,<sup>a</sup> Joaquim Puigdollers,<sup>a</sup> Isidro Martín,<sup>a</sup> Cristóbal Voz<sup>a</sup> and Ramón Alcubilla<sup>a</sup>

DOI: 10.1039/x0xx00000x

www.rsc.org/

### Electronic Supplementary Information (ESI)

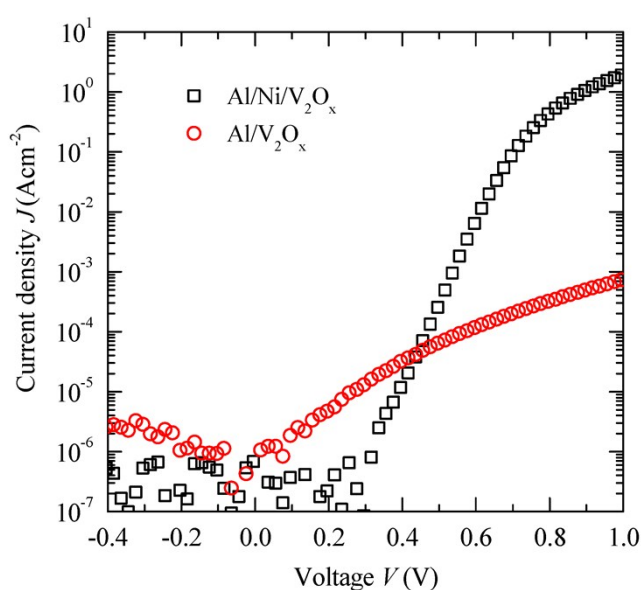

**Fig. S1** Measured dark *J-V* characteristics for 40 nm thick V<sub>2</sub>O<sub>x</sub> on c-Si(n) diode test devices using nickel or aluminium as a capping material. The curves depict a great difference between a diode test device that utilize a Ni layer and another contacted directly with aluminium.

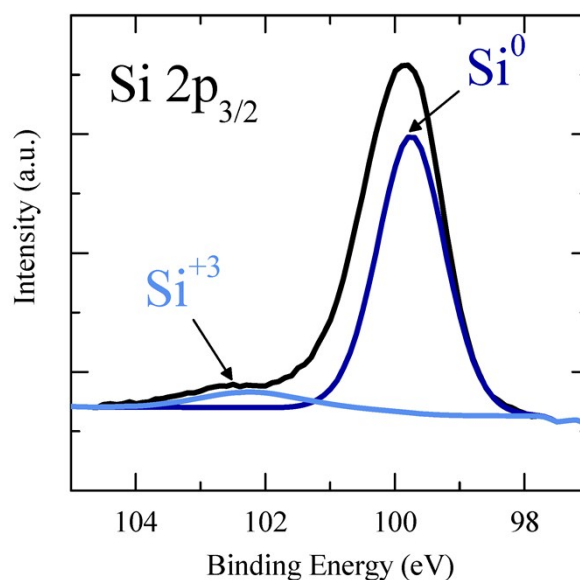

**Fig. S2** XPS spectra of the Si 2p core level, showing Si<sup>+3</sup> and Si<sup>0</sup> oxidation states.

<sup>a</sup> Department of Electronic Engineering, Universitat Politècnica de Catalunya (UPC),  
c/ Jordi Girona 1-3, Modulo C-4, 08034 Barcelona, Spain. E-mail:  
gerard.masmitja@upc.edu

† Electronic Supplementary Information (ESI) available: Additional *I-V* curve, HR-TEM image, EELS line scan. See DOI: 10.1039/x0xx00000x

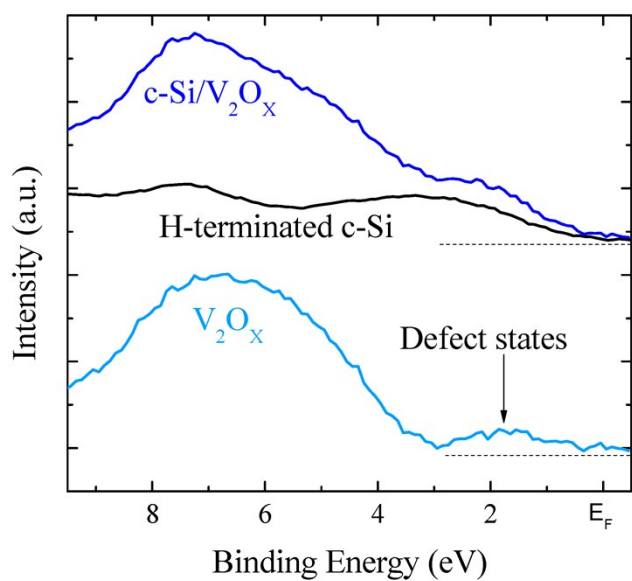

**Fig. S3** Valence band spectra measured by XPS in the vicinity of the Fermi level (0 eV), where defect states are observed at ~2 eV.

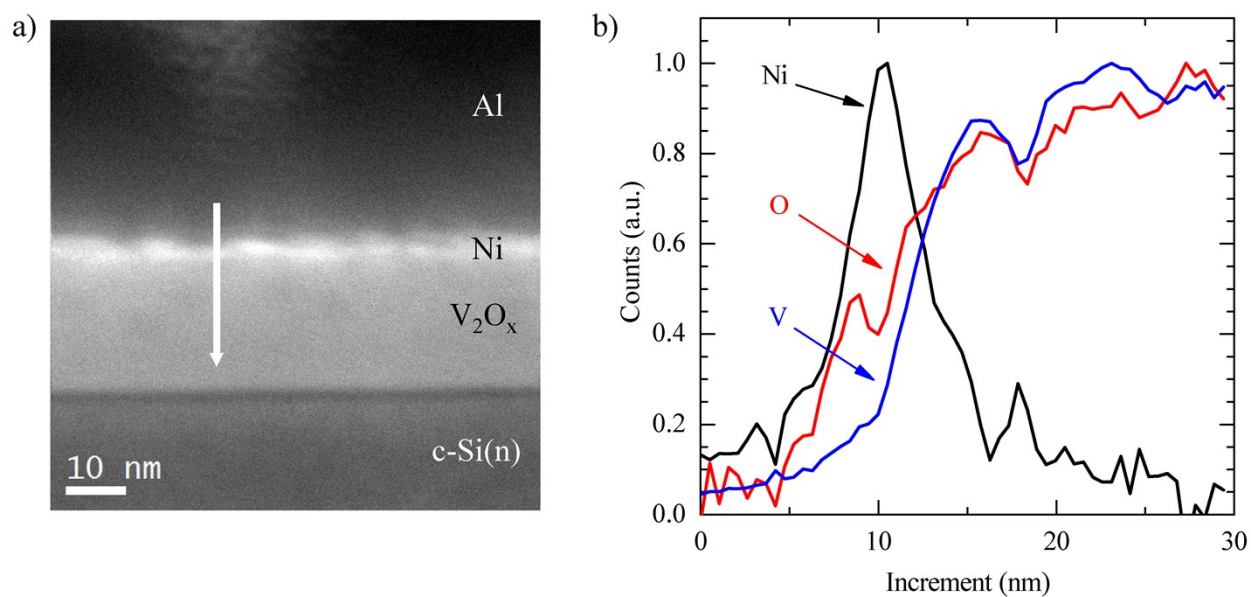

**Fig. S4** **a)** High resolution transmission electron microscopy (HR-TEM) image and **b)** an electron energy loss spectroscopy (EELS) line scan across the Al/Ni/V<sub>2</sub>O<sub>x</sub> contact stack confirms the thin uniform nickel capping layer.
